# Supplementary material for: Bactericidal activity of besifloxacin against staphylococci, Streptococcus pneumoniae and Haemophilus influenzae
Source: PubMed Central journal article supplement — J Antimicrob Chemother. 2010 Apr 30;65(7):1441–7. doi: 10.1093/jac/dkq127 (PMC2882870; doi:10.1093/jac/dkq127), 2010-04-30

## Supplementary data

### Supplementary methods

#### *PCR amplification and DNA sequencing of the QRDR regions of DNA gyrase and topoisomerase IV*

Staphylococci were grown in tryptic soy broth (Becton, Dickinson and Company, Sparks, MD, USA), *S. pneumoniae* in Todd-Hewitt broth (Becton, Dickinson and Company) and *H. influenzae* in *Haemophilus* test medium (Remel, Lenexa, KS, USA) for 18 to 24 h at 37°C. Genomic DNA was extracted from pure bacterial cultures using the Wizard Genomic DNA Purification Kit (Promega, Madison, WI, USA) according to the manufacturer's instructions. The isolated DNA was then used as the template for PCR amplification.

The QRDRs of the *gyrA*, *gyrB*, *parC* (*grlA*) and *parE* (*grlB*) genes from each isolate were amplified with primers designed with the Clone Manager 9 software package (Sci-Ed Software, Cary, NC, USA), which was also used for sequence analyses. The DNA sequences used for primer design were as follows: *H. influenzae* strains RdKW20 (GenBank accession no. NC\_000907), 86-028NP (NC\_007146) and PittEE (NC\_009566); *S. aureus* strain Newman (NC\_009641); *S. epidermidis* strain ATCC 12228 (NC\_004461); and *S. pneumoniae* strains R6 (NC\_003098) and TIGR4 (NC\_003028).

PCR was carried out in a TC-3000 thermal cycler (Techne, Burlington, NJ, USA) in a 50 µL volume containing 0.4 µM primers (Table S1; Integrated DNA Technologies, Coralville, IA, USA), 200 µM deoxynucleoside triphosphates (Omega Bio-Tek, Norcross, GA, USA), 1 U of Vent DNA polymerase and reaction buffer containing 2 mM magnesium sulphate (New England Biolabs, Ipswich, MA, USA). An initial denaturation cycle (10 min at 94°C) preceded 30 cycles consisting of 30 s of denaturation at 94°C, 30 s of annealing at 45-55°C and 1 min of elongation at 72°C, and was followed by a final elongation cycle (10 min at 72°C). Amplification products were purified using the

QIAquick PCR Purification Kit (Qiagen, Valencia, CA, USA) and sequenced by Macrogen USA (Rockville, MD, USA).

**Table S1.** Oligonucleotide primers used for PCR amplification of QRDR sequences

| Organism                                       | Target gene | Primer sequence (5' to 3')                          | Product size (bp) | Position        |
|------------------------------------------------|-------------|-----------------------------------------------------|-------------------|-----------------|
| <i>Staphylococcus aureus</i> <sup>a</sup>      | <i>gyrA</i> | GCCACCGTTGTATAAACTGAC<br>ATACCTACCGCGATACCTGATG     | 885               | 6663–7547       |
|                                                | <i>gyrB</i> | TCTGGTGAAGATACACGTGAAG<br>CTCAGGGTTCATTGTTGTTCC     | 834               | 6004–6837       |
|                                                | <i>parC</i> | TTGGTATGCAAGAGGACCAAAG<br>ACGTCCATTGCGTAAAGTTTC     | 841               | 1394067–1394907 |
|                                                | <i>parE</i> | GCTGTTGTGTCTGTTTCGATTC<br>GTCTGTCCAAGCGTATTCAACTC   | 707               | 1393127–1393833 |
| <i>Staphylococcus epidermidis</i> <sup>b</sup> | <i>gyrA</i> | GATCTCTTGATGGCTGAATTAC<br>ATACGCGCTTTATTGACTTG      | 827               | 6907–7733       |
|                                                | <i>gyrB</i> | GAGGAAGTTAGAGAAGACTCATATC<br>GTATATGTGCACCATCAACATC | 892               | 5602–6493       |
|                                                | <i>parC</i> | AAAGTTGAGTACGCTTGGACTG<br>TCGCTGGTAATACCATTGGTTC    | 816               | 1044535–1045350 |
|                                                | <i>parE</i> | TTGGCACTTCAGAAGCAAGG<br>CCGAGTTTCTGGATTCATGGTAG     | 764               | 1043915–1044678 |
| <i>Streptococcus pneumoniae</i> <sup>c</sup>   | <i>gyrA</i> | AGCACCATCACCGACAAG<br>ATCCCAACCGCGATACCAG           | 771               | 1150102–1149332 |
|                                                | <i>gyrB</i> | CAAGATTACCAATCGCCTCTTC<br>CTGCTTCTGCAGCATCATCTAC    | 791               | 761552–762,342  |
|                                                | <i>parC</i> | GAGTTGAACACGCCCTAGATAC<br>CCCAGTCTCATAGGCTTTCTTG    | 804               | 752142–752945   |
|                                                | <i>parE</i> | GAGGGACTAGCGGCCGTTCTTTC<br>TTCTCCGTCCGTCCAAGCGTAGG  | 726               | 750850–751575   |
| <i>Haemophilus influenzae</i> <sup>d</sup>     | <i>gyrA</i> | ATGACGGATTCAATCCAATCATC<br>TGGGCCCCGGAATATGTTG      | 648               | 1739444–1740091 |
|                                                | <i>gyrB</i> | TGAAATGACGCGCCGTAAAG<br>GCGTCCGCGTTAAATTGTG         | 805               | 27686–28490     |
|                                                | <i>parC</i> | CAAGCGAAAGGCGATCAG<br>TATTGAGCCACGACCTTG            | 831               | 1600152–1600982 |
|                                                | <i>parE</i> | CCTACGCCATTTATTAAGAGC<br>GACTTTACCATAGCGAAGTTG      | 907               | 1598837–1599743 |

DNA reference strain used for primer design (GenBank accession number): <sup>a</sup>Newman (NC\_009641); <sup>b</sup>ATCC 12228 (NC\_004461); <sup>c</sup>TIGR4 (NC\_003028) and R6 (NC\_003098); and <sup>d</sup>86-028NP (NC\_007146), PittEE (NC\_009566) and RdKW20 (NC\_00907).

**Figure S1.** Change in cfu/mL over time after the addition of besifloxacin. Strains were treated with 1× (filled circles), 2× (open circles), 4× (filled diamonds) or 8× (open diamonds) the MIC of besifloxacin. A no-treatment control is identified by filled triangles. A 3 log reduction in viable cells is indicated by a continuous horizontal line. 1× besifloxacin MIC values are shown in parentheses. MSSA, methicillin-susceptible *S. aureus*; MRSA, methicillin-resistant *S. aureus*; MSSE, methicillin-susceptible *S. epidermidis*; MRSE, methicillin-resistant *S. epidermidis*; PSSP, penicillin-susceptible *S. pneumoniae*; BLNHI,  $\beta$ -lactamase-negative *H. influenzae*; FQS, fluoroquinolone susceptible; FQNS, fluoroquinolone non-susceptible; FQR, fluoroquinolone resistant.

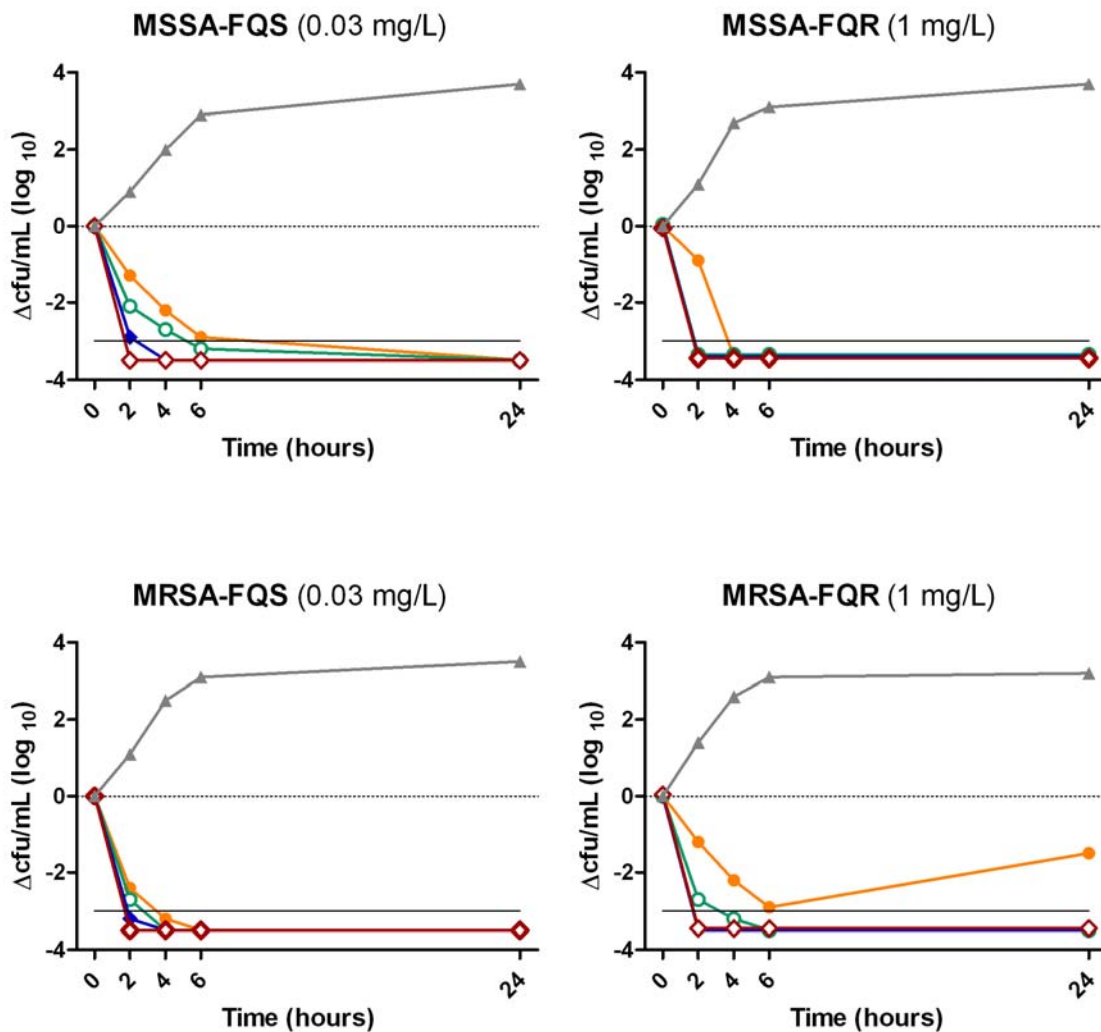

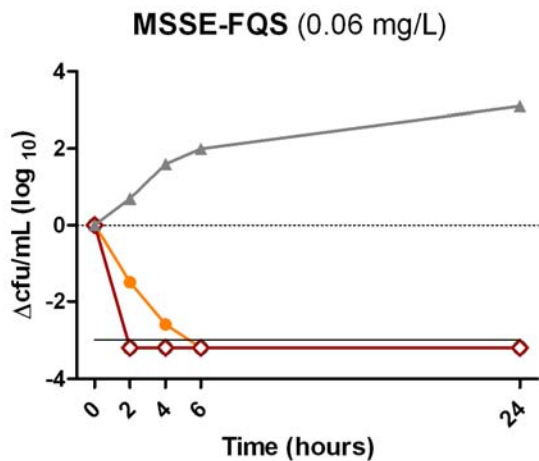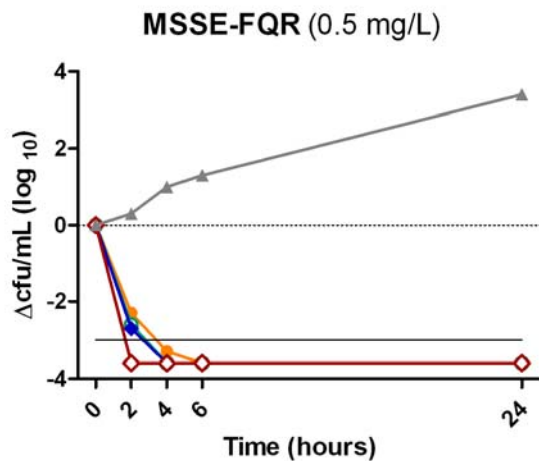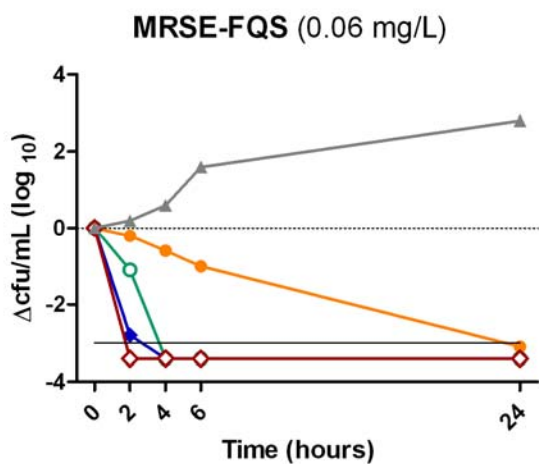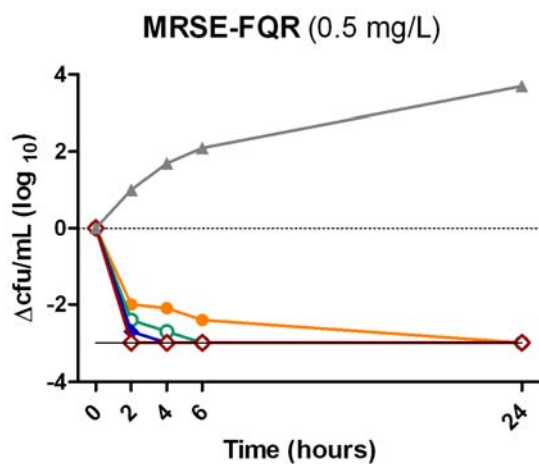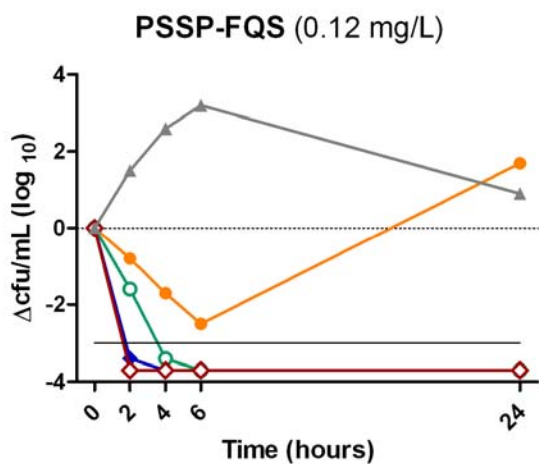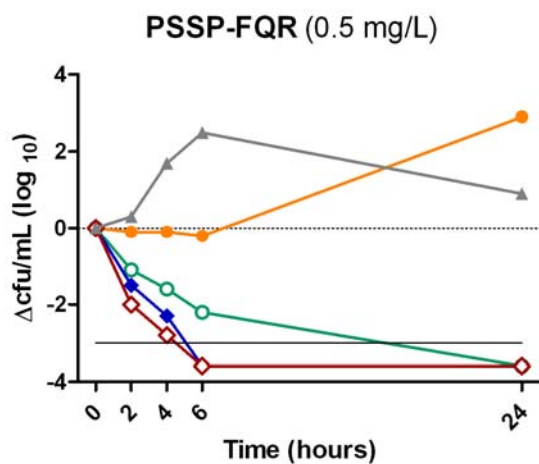

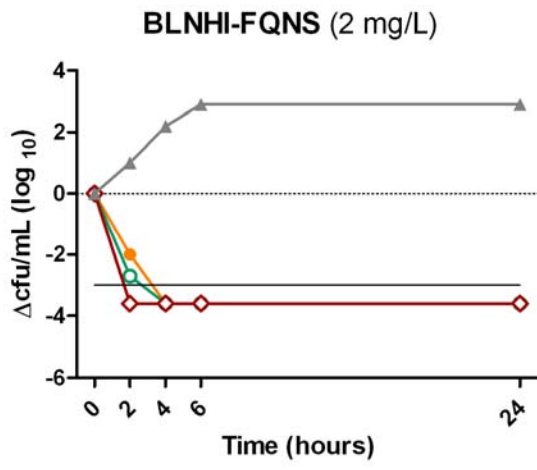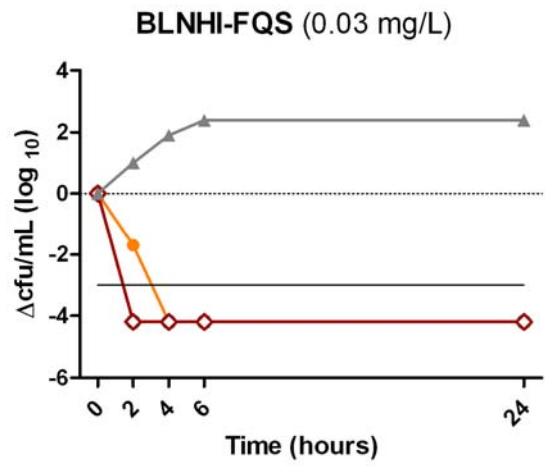

**Figure S2.** Change in cfu/mL 2 h after the addition of 1×, 2×, 4× or 8× the MIC of besifloxacin (filled circles), moxifloxacin (open squares) or ciprofloxacin (open triangles). A 3 log reduction in viable cells is indicated by a continuous horizontal line. MRSA, methicillin-resistant *S. aureus*; MSSE, methicillin-susceptible *S. epidermidis*; MRSE, methicillin-resistant *S. epidermidis*; PSSP, penicillin-susceptible *S. pneumoniae*; BLNHI,  $\beta$ -lactamase-negative *H. influenzae*; FQS, fluoroquinolone susceptible; FQNS, fluoroquinolone non-susceptible; FQR, fluoroquinolone resistant.

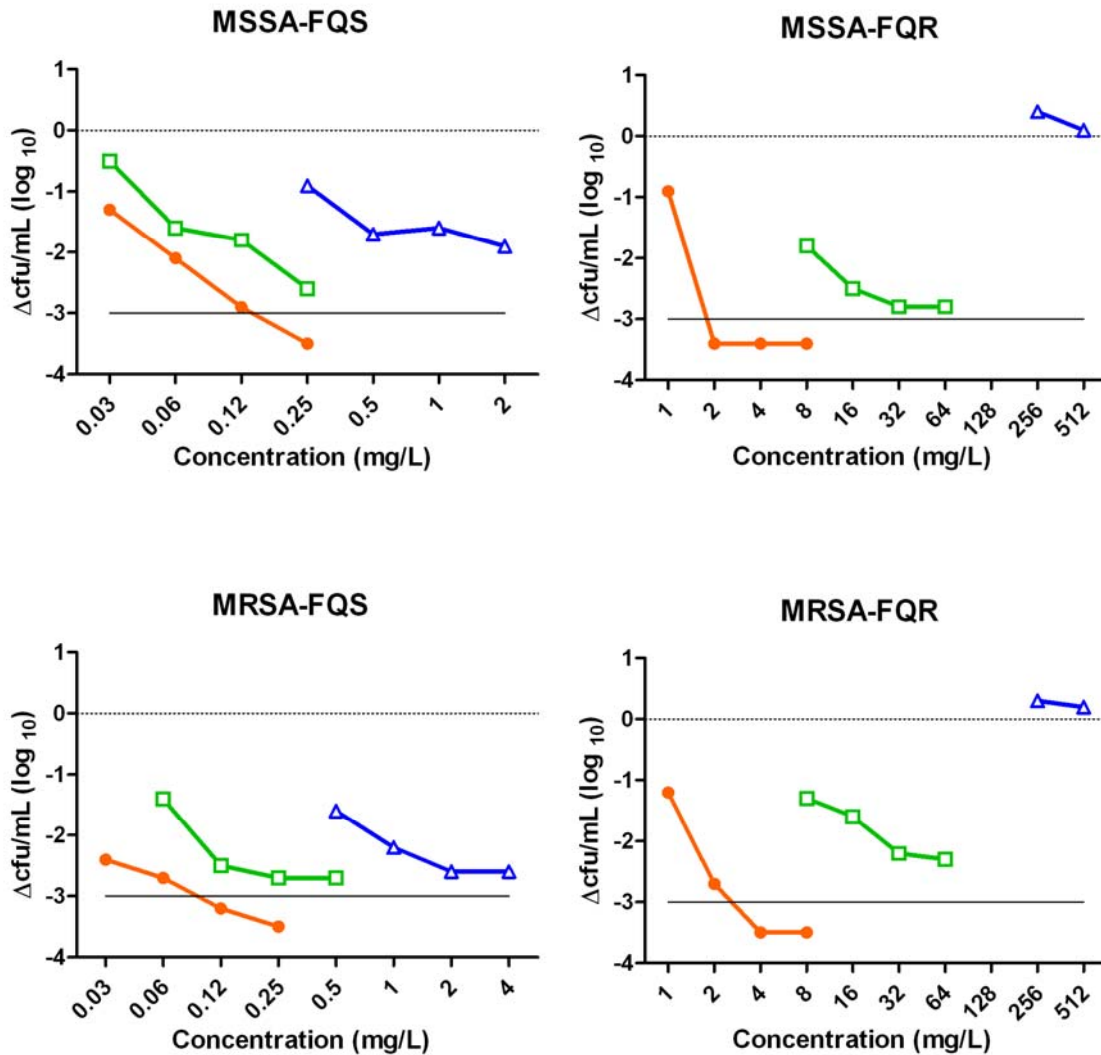

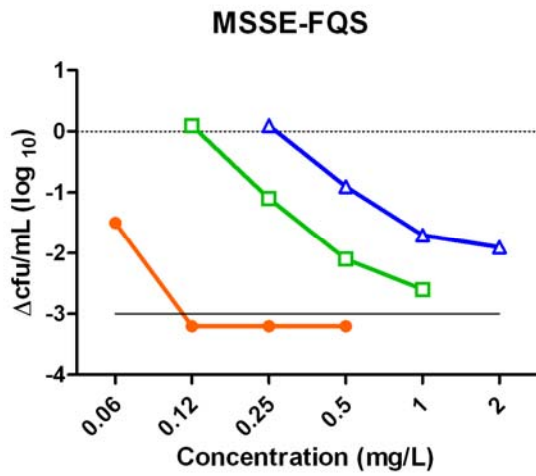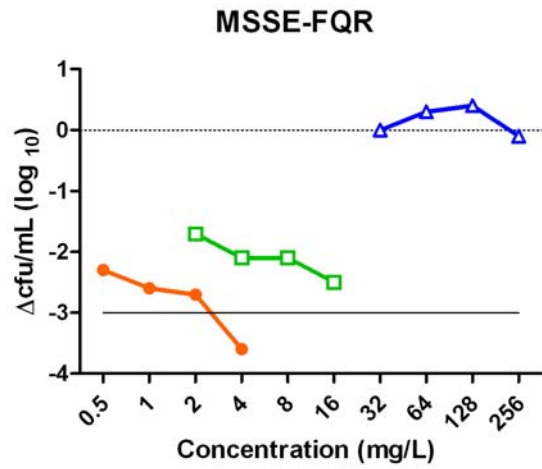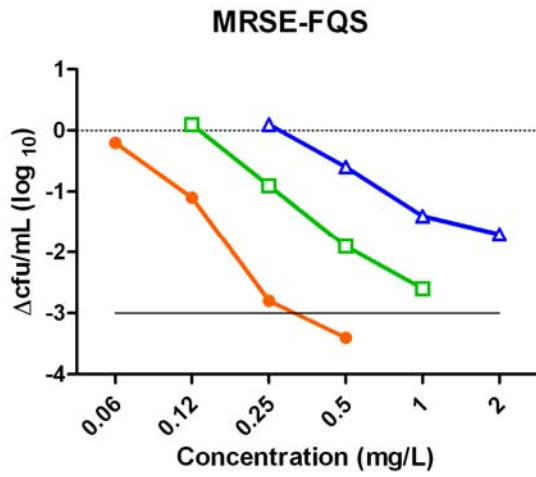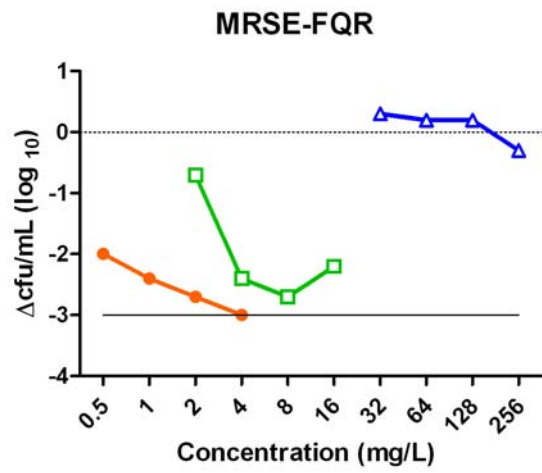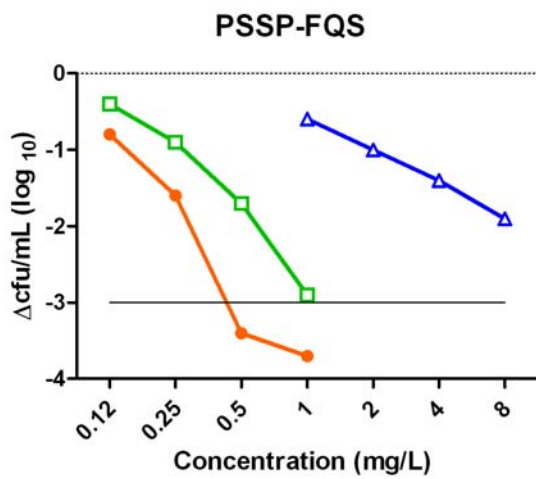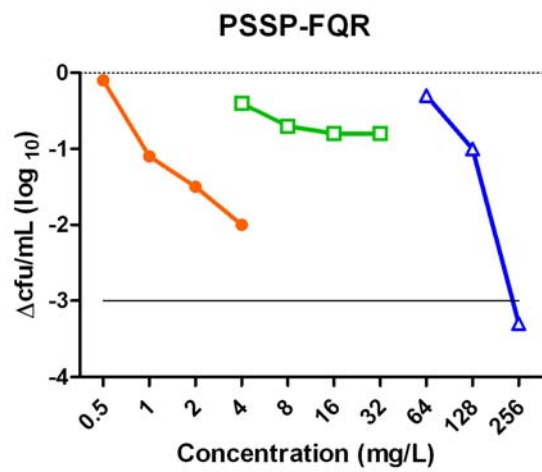

BLNHI-FQS

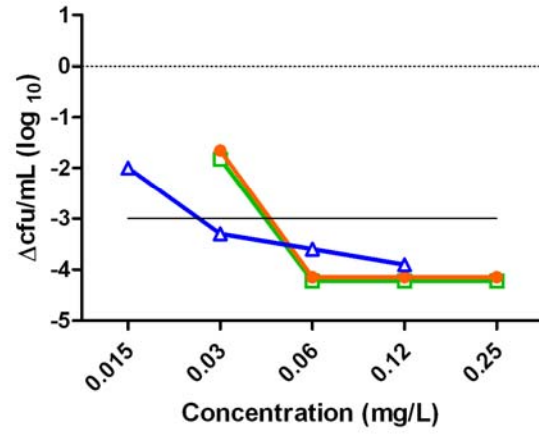

BLNHI-FQNS

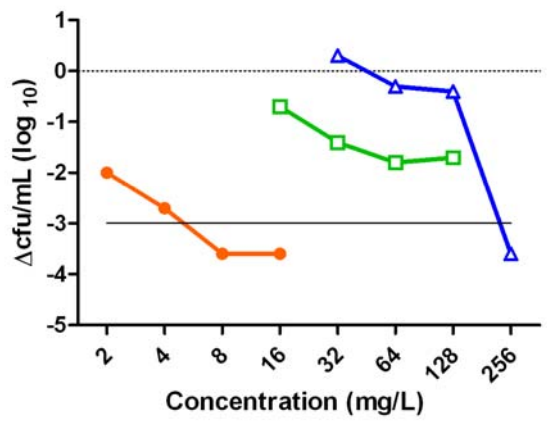

Supplement: dkq127_1.pdf [file dkq127_1.pdf]
